# Supplementary material for: Unusual pore structure and sorption behaviour in a hexanodal zinc–organic framework material
Source: Royal Society of Chemistry journal article supplement (doi:10.1039/c3cc48556k), 2013-12-04
Supplement: c3cc48556k.pdf [file c3cc48556k.pdf]

## SUPPORTING INFORMATION

### Unusual pore structure and sorption behaviour in a hexanodal zinc-organic framework material

*Jinjie Qian<sup>a,b</sup> Feilong Jiang,<sup>a</sup> Linjie Zhang,<sup>a,b</sup> Kongzhao Su,<sup>a,b</sup> Jie Pan,<sup>a,b</sup> Qipeng Li,<sup>a,b</sup>  
Daqiang Yuan<sup>a</sup> and Maochun Hong<sup>\*a</sup>*

<sup>a</sup>Key Laboratory of Coal to Ethylene Glycol and Its Related Technology, State Key Laboratory of Structure Chemistry, Fujian Institute of Research on the Structure of Matter, Chinese Academy of Sciences, Fuzhou, Fujian, 350002, China

<sup>b</sup>Graduate School of the Chinese Academy of Sciences, Beijing, 100049, China

*\*To whom correspondence should be addressed: E-mail: [hmc@fjirsm.ac.cn](mailto:hmc@fjirsm.ac.cn); Fax: +86-591-83794946; Tel: +86-591-83792460*

## Table of Contents

|                                                                  |         |
|------------------------------------------------------------------|---------|
| <b>Section S1. General Experimental Procedures</b>               | S2-S3   |
| <b>Section S2. Single-Crystal X-ray Crystallography</b>          | S4-S5   |
| <b>Section S3. Additional Structural and Topological Figures</b> | S6-S9   |
| <b>Section S4. Topological Analysis Results</b>                  | S10-S12 |
| <b>Section S5. Powder X-Ray Diffraction</b>                      | S13     |
| <b>Section S6. TGA Plots</b>                                     | S13     |
| <b>Section S7. Gas Sorption Test</b>                             | S14-S17 |
| <b>Section S8. IAST adsorption selectivity calculation</b>       | S18-S19 |
| <b>Section S9. References</b>                                    | S20     |

## S1. General Experimental Procedures

### 1.1. Materials and Methods.

Reactions were carried out in 23 ml glass vials under autogenous pressure. All the reactants are of reagent-grade quality and used as commercially purchased without further purification. The power X-ray diffraction patterns (PXRD) were collected by a Rigaku D using Cu K $\alpha$  radiation ( $\lambda = 0.154$  nm). Single gas adsorption measurements were performed in the Accelerated Surface Area and Porosimetry 2020 (ASAP2020) System. Elemental analyses for C, H, N were carried out on a German Elementary Vario EL III instrument. Thermogravimetric analyses (TGA) were recorded on a NETZSCH STA 449C unit at a heating rate of 10 °C·min<sup>-1</sup> under flowing nitrogen atmosphere. SEM images were taken by Phenom G2.

### 1.2. Synthesis of [Me<sub>2</sub>NH<sub>2</sub>]<sub>2</sub>[Zn<sub>10</sub>(BTC)<sub>6</sub>( $\mu_3$ -O)( $\mu_4$ -O)(H<sub>2</sub>O)<sub>5</sub>] $\cdot$ 3DMA $\cdot$ 9H<sub>2</sub>O (**FJI-3**)

A mixture of Zn(ClO<sub>4</sub>)<sub>2</sub>·6H<sub>2</sub>O (0.10 mmol, 37 mg), H<sub>3</sub>BTC (0.10 mmol, 21 mg, H<sub>3</sub>BTC = 1,3,5-benzenetricarboxylate) in N,N'-dimethylacetamide (DMA) (5 ml) with an additional HBF<sub>4</sub> (0.1 ml, Tetrafluoroboric acid, 40% in water) was sealed in a 23 ml glass vial, which was heated at 100 °C for 5 days, and cooled down to room temperature. It is worth pointing here is that the distorted Me<sub>2</sub>NH<sub>2</sub><sup>+</sup> cations locate inside the large solvent accessible void, which is the byproduct of *in situ* decomposition of the DMA solvent, thus leading to the charge equilibrium. After washed by fresh acetonitrile, the colorless crystals of **FJI-3** were obtained in *ca.* ~50% yield based on the BTC ligand. Elemental analysis was calculated for **FJI-3**: C, 33.17%; H, 3.54%; N, 2.76%. Found: C, 33.43%; H, 3.78%; N, 2.96%. The phase purity of the sample was confirmed by powder X-ray diffraction (PXRD) and more details are shown below in Section S5.

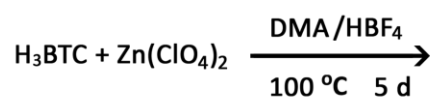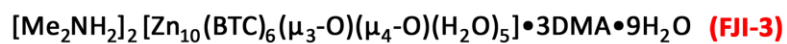

**Scheme S1.** The synthesis of **FJI-3**.

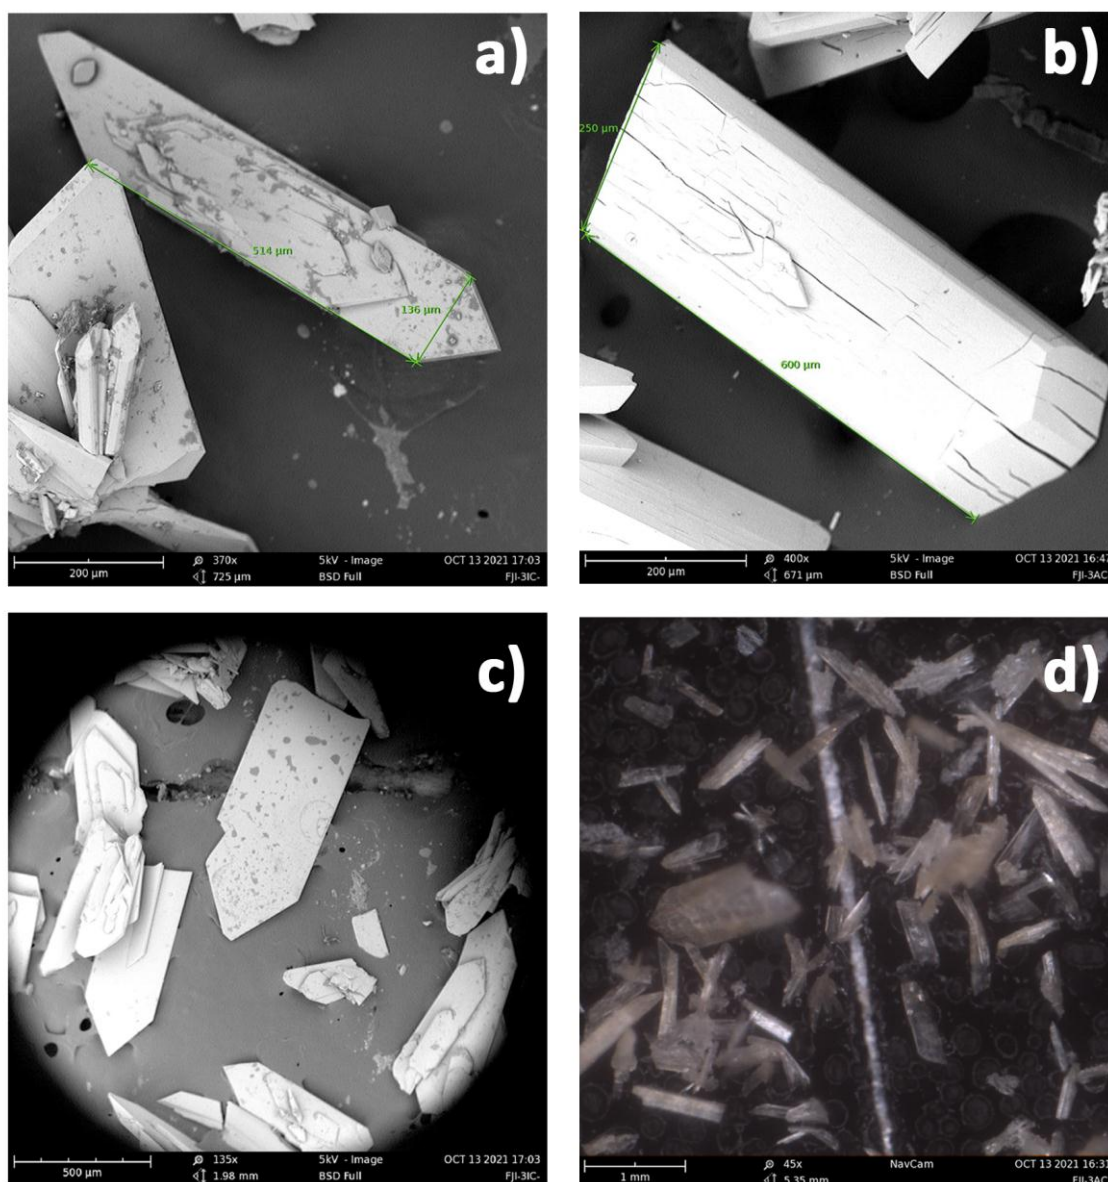

**Figure S1.** SEM images of the **FJI-3** before (a, c) and after the activation process (b, d).

## S2. Single-Crystal X-ray Crystallography

The structure data of **FJI-3** was collected on a Rigaku Mercury CCD diffractometer equipped with a graphite-monochromated Mo K $\alpha$  radiation ( $\lambda = 0.71073\text{\AA}$ ) at room temperature and the structure was resolved by the direct method and refined by full-matrix least-squares fitting on  $F^2$  by SHELX-97.<sup>S1</sup> Crystallographic data and structure refinement parameters at 173 (2) K for **FJI-3** are listed in Table S1. We employed PLATON/SQUEEZE<sup>S2</sup> to calculate the contribution to the diffraction from the solvent region and thereby produced a set of solvent-free diffraction intensities. The final formula of **FJI-3** was calculated from the SQUEEZE results combined with elemental analysis data and TGA data. More details on the crystallographic studies as well as atomic displacement parameters are given in Supporting Information as CIF files. Crystallographic data for the structure reported in this paper has been deposited. The following crystal structure has been deposited at the Cambridge Crystallographic Data Centre and allocated the deposition number (CCDC No.) 967656 for **FJI-3**.

**Table S1. Crystal Data and Structure Refinement for FJI-3 at 173 (2) K.**

| Items                                                                         | FJI-3-T173K                                                    |
|-------------------------------------------------------------------------------|----------------------------------------------------------------|
| chemical formula                                                              | C <sub>27</sub> H <sub>9</sub> O <sub>22</sub> Zn <sub>5</sub> |
| formula mass                                                                  | 1012.19                                                        |
| crystal system                                                                | Orthorhombic                                                   |
| space group                                                                   | <i>I</i> bam (#. 72)                                           |
| <i>a</i> (Å)                                                                  | 19.7757(2)                                                     |
| <i>b</i> (Å)                                                                  | 44.7064(5)                                                     |
| <i>c</i> (Å)                                                                  | 28.6303(3)                                                     |
| $\alpha$ (°)                                                                  | 90.00                                                          |
| $\beta$ (°)                                                                   | 90.00                                                          |
| $\gamma$ (°)                                                                  | 90.00                                                          |
| unit cell volume (Å <sup>3</sup> )                                            | 25312.1(5)                                                     |
| temperature (K)                                                               | 173 (2)                                                        |
| <i>Z</i>                                                                      | 16                                                             |
| F(000)                                                                        | 7952                                                           |
| no. of reflections measured                                                   | 26679                                                          |
| no. of independent reflections                                                | 10953                                                          |
| <i>R</i> <sub>int</sub>                                                       | 0.0960                                                         |
| final <i>R</i> 1 values ( <i>I</i> >2σ( <i>I</i> ))                           | 0.0850                                                         |
| final w <i>R</i> ( <i>F</i> <sup>2</sup> ) values ( <i>I</i> >2σ( <i>I</i> )) | 0.2709                                                         |
| goodness of fit on <i>F</i> <sup>2</sup>                                      | 1.072                                                          |
| flack parameter                                                               | 0.00(2)                                                        |

### S3. Additional X-ray Crystal Structural and Topological Figures

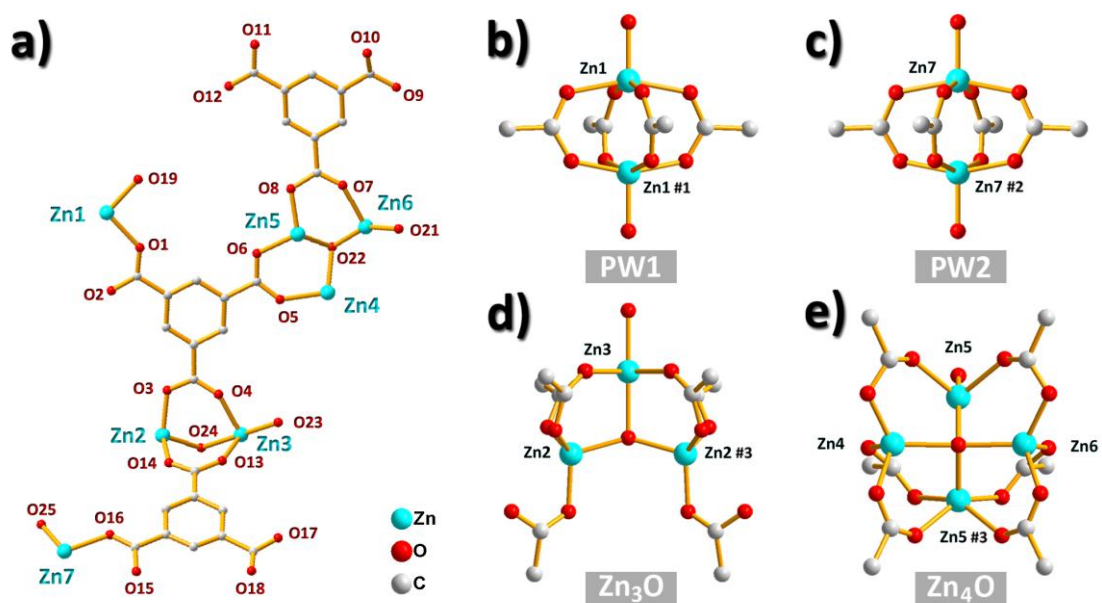

**Figure S2.** Coordination condition of Zn(II) centers and BTC(III) ligands in the asymmetric unit of **FJI-3**, secondary building units (SBUs), symmetry codes: #1 = 1-x, y, 0.5-z; #2 = -x, 1-y, z; #3 = x, y, 1-z.

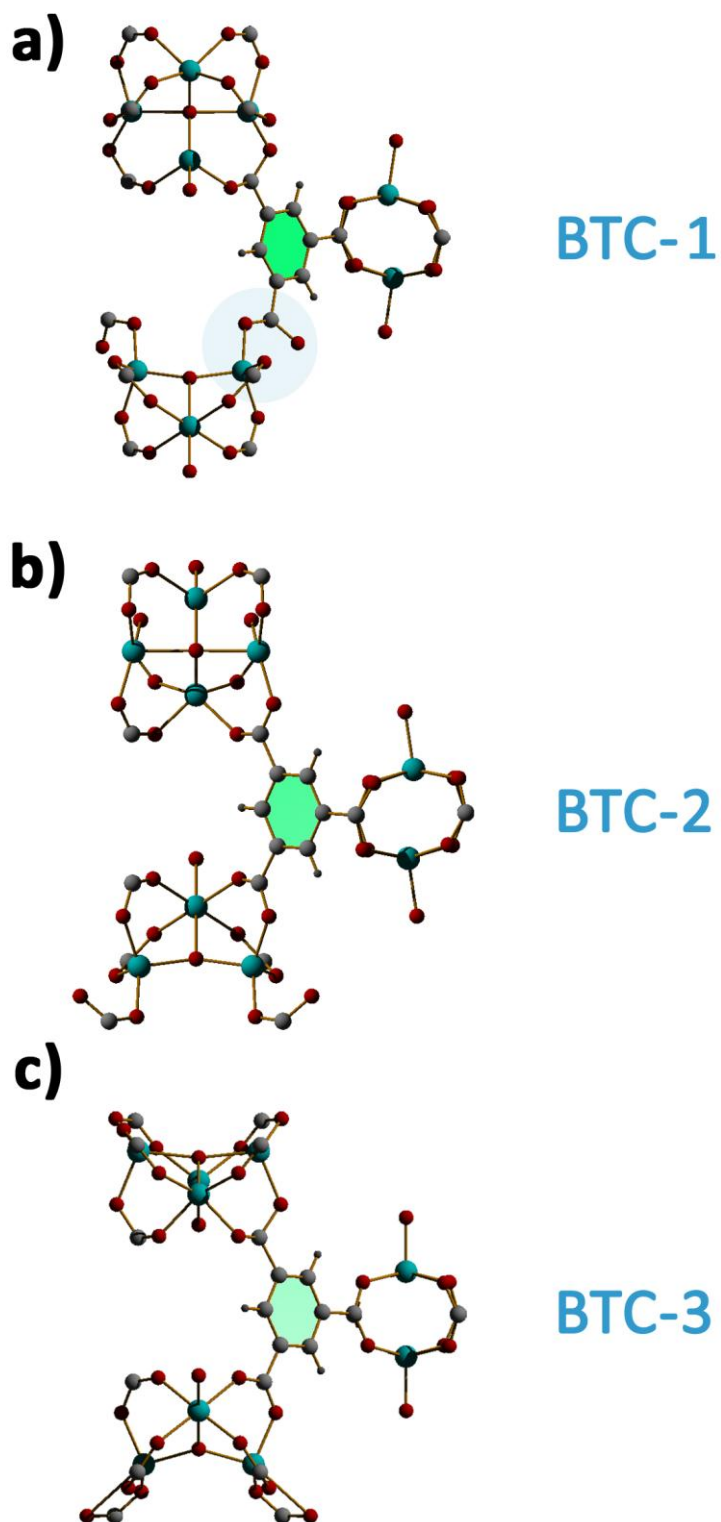

**Figure S3.** Coordination environment of BTC ligands in **FJI-3**, namely BTC-1 (a), BTC-2 (b) BTC-3 (c).



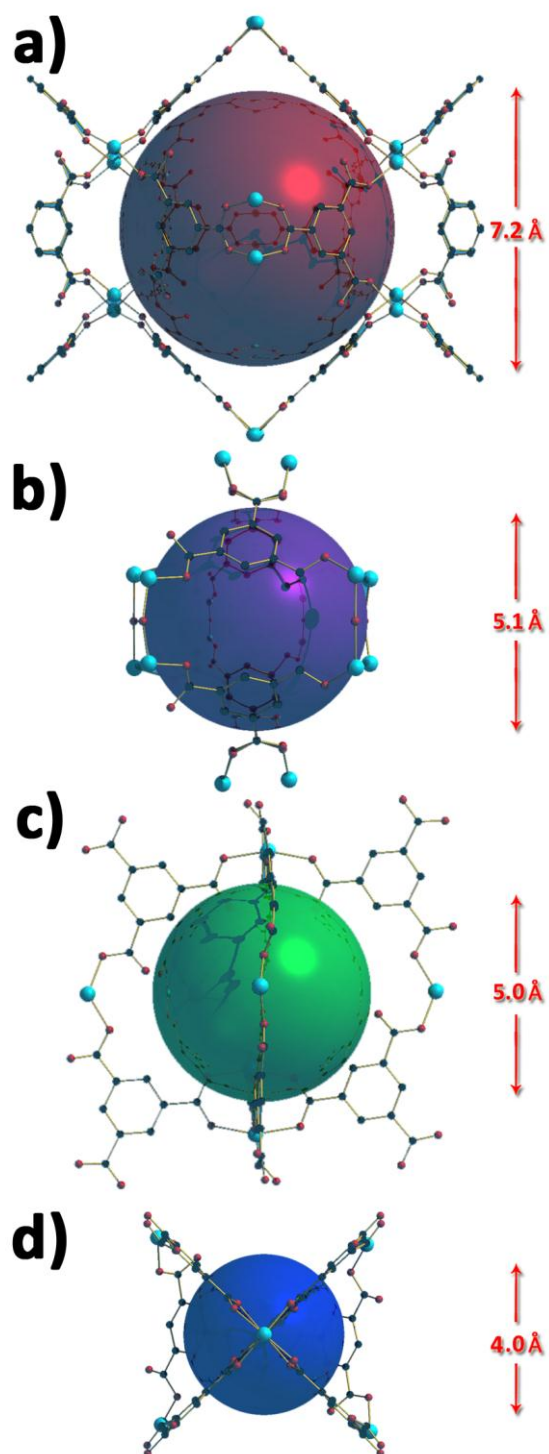

**Figure S4.** Four kinds of microporous cages in **FJI-3** with different sizes.

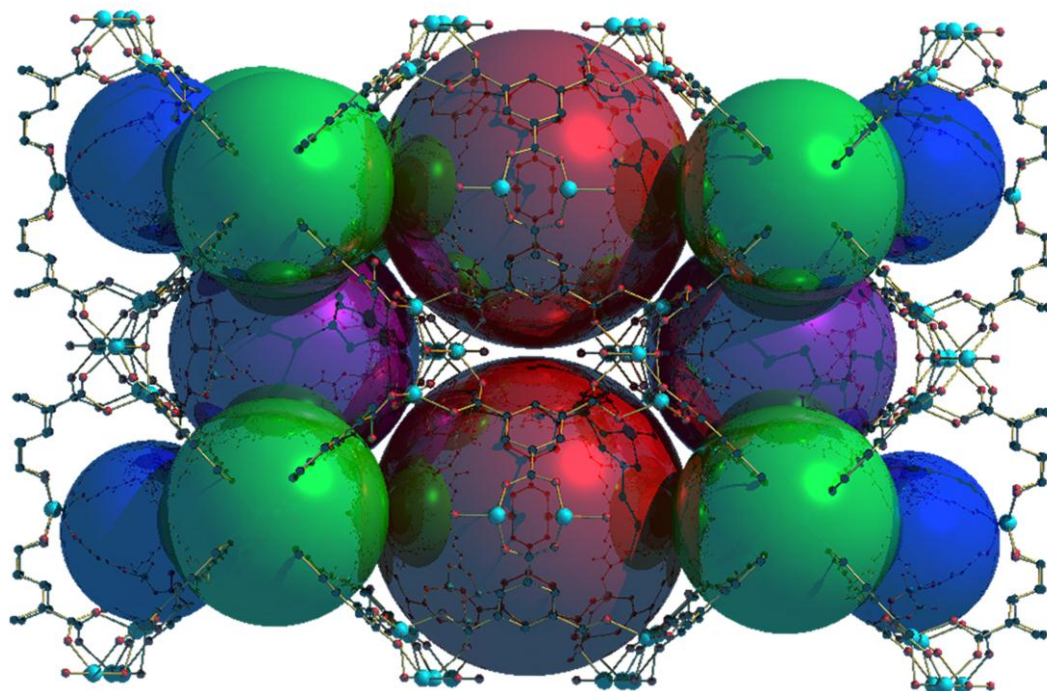

**Figure S5.** Four kinds of microporous cages packed in **FJI-3**.

## S4. Topological Analysis Results by TOPOS 4.0

#####

**Name: FJI-3**

#####

-----  
 Topology for **BTC-1**: Atom **BTC-1** links by bridge ligands and has

|                        | Common vertex with |        |        |          | R(A-A) |   |
|------------------------|--------------------|--------|--------|----------|--------|---|
| <b>PW1</b>             | 0.0000             | 0.2333 | 0.2500 | ( 0 0 0) | 5.453A | 1 |
| <b>Zn<sub>4</sub>O</b> | -0.2211            | 0.3907 | 0.5000 | (-1 0 0) | 6.562A | 1 |
| <b>Zn<sub>3</sub>O</b> | 0.2694             | 0.3915 | 0.5000 | ( 0 0 0) | 6.824A | 1 |

-----  
 Topology for **BTC-2**: Atom **BTC-2** links by bridge ligands and has

|                        | Common vertex with |        |        |           | R(A-A) |   |
|------------------------|--------------------|--------|--------|-----------|--------|---|
| <b>PW1</b>             | 0.5000             | 0.2667 | 0.2500 | ( 0 0 -1) | 5.462A | 1 |
| <b>Zn<sub>3</sub>O</b> | 0.2694             | 0.3915 | 0.5000 | ( 0 0 0)  | 5.937A | 1 |
| <b>Zn<sub>4</sub>O</b> | 0.7789             | 0.3907 | 0.5000 | ( 0 0 0)  | 6.545A | 1 |

-----  
 Topology for **BTC-3**: Atom **BTC-3** links by bridge ligands and has

|                        | Common vertex with |        |        |          | R(A-A) |   |
|------------------------|--------------------|--------|--------|----------|--------|---|
| <b>PW2</b>             | 0.0000             | 0.5000 | 0.2500 | ( 0 0 0) | 5.437A | 1 |
| <b>Zn<sub>4</sub>O</b> | 0.2211             | 0.6093 | 0.5000 | ( 1 1 0) | 5.830A | 1 |
| <b>Zn<sub>3</sub>O</b> | 0.2694             | 0.3915 | 0.5000 | ( 0 0 0) | 6.139A | 1 |

-----  
 Topology for **PW1**: Atom **PW1** links by bridge ligands and has

|              | Common vertex with |        |        |           | R(A-A) |   |
|--------------|--------------------|--------|--------|-----------|--------|---|
| <b>BTC-1</b> | 0.0156             | 0.3213 | 0.3814 | ( 0 0 0)  | 5.453A | 1 |
| <b>BTC-1</b> | -0.0156            | 0.3213 | 0.1186 | ( 0 0 0)  | 5.453A | 1 |
| <b>BTC-2</b> | -0.0048            | 0.1487 | 0.1124 | ( 0 0 0)  | 5.462A | 1 |
| <b>BTC-2</b> | 0.0048             | 0.1487 | 0.3876 | (-1 0 -1) | 5.462A | 1 |

-----  
 Topology for **PW2**: Atom **PW2** links by bridge ligands and has

|              | Common vertex with |        |        |          | R(A-A) |   |
|--------------|--------------------|--------|--------|----------|--------|---|
| <b>BTC-3</b> | 0.1932             | 0.5024 | 0.3851 | ( 0 0 0) | 5.437A | 1 |
| <b>BTC-3</b> | -0.1932            | 0.5024 | 0.1149 | ( 0 0 0) | 5.437A | 1 |
| <b>BTC-3</b> | 0.1932             | 0.4976 | 0.1149 | ( 0 1 0) | 5.437A | 1 |
| <b>BTC-3</b> | -0.1932            | 0.4976 | 0.3851 | ( 0 1 0) | 5.437A | 1 |

-----  
 Topology for **Zn<sub>3</sub>O**: Atom **Zn<sub>3</sub>O** links by bridge ligands and has

|              | Common vertex with |        |        |          | R(A-A) |   |
|--------------|--------------------|--------|--------|----------|--------|---|
| <b>BTC-2</b> | 0.5048             | 0.3513 | 0.3876 | ( 0 0 0) | 5.937A | 1 |
| <b>BTC-2</b> | 0.5048             | 0.3513 | 0.6124 | ( 0 0 1) | 5.937A | 1 |
| <b>BTC-3</b> | 0.1932             | 0.5024 | 0.6149 | ( 0 0 1) | 6.139A | 1 |

|              |        |        |        |         |        |   |
|--------------|--------|--------|--------|---------|--------|---|
| <b>BTC-3</b> | 0.1932 | 0.5024 | 0.3851 | (0 0 0) | 6.139A | 1 |
| <b>BTC-1</b> | 0.0156 | 0.3213 | 0.6186 | (0 0 1) | 6.824A | 1 |
| <b>BTC-1</b> | 0.0156 | 0.3213 | 0.3814 | (0 0 0) | 6.824A | 1 |

-----  
 Topology for **Zn<sub>4</sub>O**: Atom **Zn<sub>4</sub>O** links by bridge ligands and has

| Common vertex with | R(A-A) |        |        |         |        |   |
|--------------------|--------|--------|--------|---------|--------|---|
| <b>BTC-3</b>       | 0.8068 | 0.4976 | 0.6149 | (1 1 1) | 5.830A | 1 |
| <b>BTC-3</b>       | 0.8068 | 0.4976 | 0.3851 | (1 1 0) | 5.830A | 1 |
| <b>BTC-2</b>       | 0.5048 | 0.3513 | 0.6124 | (0 0 1) | 6.545A | 1 |
| <b>BTC-2</b>       | 0.5048 | 0.3513 | 0.3876 | (0 0 0) | 6.545A | 1 |
| <b>BTC-1</b>       | 1.0156 | 0.3213 | 0.3814 | (1 0 0) | 6.562A | 1 |
| <b>BTC-1</b>       | 1.0156 | 0.3213 | 0.6186 | (1 0 1) | 6.562A | 1 |

-----  
 Structural group analysis, Coordination sequences

| <b>BTC-1:</b> | 1 | 2  | 3  | 4  | 5   | 6   | 7   | 8   | 9   | 10   |
|---------------|---|----|----|----|-----|-----|-----|-----|-----|------|
| Num           | 3 | 12 | 17 | 49 | 50  | 116 | 93  | 213 | 167 | 342  |
| Cum           | 4 | 16 | 33 | 82 | 132 | 248 | 341 | 554 | 721 | 1063 |

| <b>BTC-2:</b> | 1 | 2  | 3  | 4  | 5   | 6   | 7   | 8   | 9   | 10   |
|---------------|---|----|----|----|-----|-----|-----|-----|-----|------|
| Num           | 3 | 12 | 19 | 53 | 48  | 116 | 101 | 219 | 165 | 344  |
| Cum           | 4 | 16 | 35 | 88 | 136 | 252 | 353 | 572 | 737 | 1081 |

| <b>BTC-3:</b> | 1 | 2  | 3  | 4  | 5   | 6   | 7   | 8   | 9   | 10   |
|---------------|---|----|----|----|-----|-----|-----|-----|-----|------|
| Num           | 3 | 12 | 17 | 47 | 49  | 124 | 100 | 211 | 156 | 328  |
| Cum           | 4 | 16 | 33 | 80 | 129 | 253 | 353 | 564 | 720 | 1048 |

| <b>PW1:</b> | 1 | 2  | 3  | 4  | 5   | 6   | 7   | 8   | 9   | 10   |
|-------------|---|----|----|----|-----|-----|-----|-----|-----|------|
| Num         | 4 | 8  | 36 | 33 | 80  | 74  | 168 | 128 | 284 | 217  |
| Cum         | 5 | 13 | 49 | 82 | 162 | 236 | 404 | 532 | 816 | 1033 |

| <b>PW2:</b> | 1 | 2  | 3  | 4  | 5   | 6   | 7   | 8   | 9   | 10  |
|-------------|---|----|----|----|-----|-----|-----|-----|-----|-----|
| Num         | 4 | 8  | 28 | 28 | 76  | 74  | 176 | 122 | 256 | 208 |
| Cum         | 5 | 13 | 41 | 69 | 145 | 219 | 395 | 517 | 773 | 981 |

| <b>Zn<sub>3</sub>O:</b> | 1 | 2  | 3  | 4  | 5   | 6   | 7   | 8   | 9   | 10   |
|-------------------------|---|----|----|----|-----|-----|-----|-----|-----|------|
| Num                     | 6 | 9  | 28 | 33 | 88  | 74  | 166 | 135 | 282 | 195  |
| Cum                     | 7 | 16 | 44 | 77 | 165 | 239 | 405 | 540 | 822 | 1017 |

| <b>Zn<sub>4</sub>O:</b> | 1 | 2  | 3  | 4  | 5   | 6   | 7   | 8   | 9   | 10   |
|-------------------------|---|----|----|----|-----|-----|-----|-----|-----|------|
| Num                     | 6 | 9  | 28 | 33 | 88  | 74  | 166 | 135 | 282 | 195  |
| Cum                     | 7 | 16 | 44 | 77 | 165 | 239 | 405 | 540 | 822 | 1017 |

Vertex symbols for selected sublattice

-----  
**BTC-1** Point (Schlafli) symbol: {4.8<sup>2</sup>}

Extended point symbol:[4.8(8).8(8)]

-----  
**BTC-2** Point (Schlafli) symbol: {4.8<sup>2</sup>}

Extended point symbol:[4.8(7).8(7)]

-----  
**BTC-3** Point (Schlafli) symbol: {4.6<sup>2</sup>}

Extended point symbol:[4.6(2).6(2)]

-----  
**PW1** Point (Schlafli) symbol: {8<sup>6</sup>}

Extended point symbol:[8(2).8(2).8(4).8(6).8(8).8(8)]

-----  
**PW2** Point (Schlafli) symbol: {6<sup>2</sup>.8<sup>4</sup>}

Extended point symbol:[6(4).6(4).8(2).8(2).8(4).8(4)]

-----  
**Zn<sub>3</sub>O** Point (Schlafli) symbol: {4<sup>3</sup>.6<sup>4</sup>.8<sup>8</sup>}

Extended point symbol:[4.4.4.6.6.6.6.8.8.8(3).8(3).8(4).8(4).8(5).8(5)]

-----  
**Zn<sub>4</sub>O** Point (Schlafli) symbol: {4<sup>3</sup>.6<sup>4</sup>.8<sup>8</sup>}

Extended point symbol:[4.4.4.6.6.6.6.8.8.8(3).8(3).8(4).8(4).8(5).8(5)]

-----  
Point (Schlafli) symbol for net: {4.6<sup>2</sup>}<sub>4</sub>{4.8<sup>2</sup>}<sub>8</sub>{4<sup>3</sup>.6<sup>4</sup>.8<sup>8</sup>}<sub>4</sub>{6<sup>2</sup>.8<sup>4</sup>}<sub>2</sub>{8<sup>6</sup>}<sub>2</sub>  
3,3,3,4,4,6-c net with stoichiometry (3-c)<sub>4</sub>(3-c)<sub>4</sub>(3-c)<sub>4</sub>(4-c)<sub>2</sub>(4-c)<sub>2</sub>(6-c)<sub>4</sub>; 6-nodal net

**New topology**

## S5. Powder X-Ray Diffraction

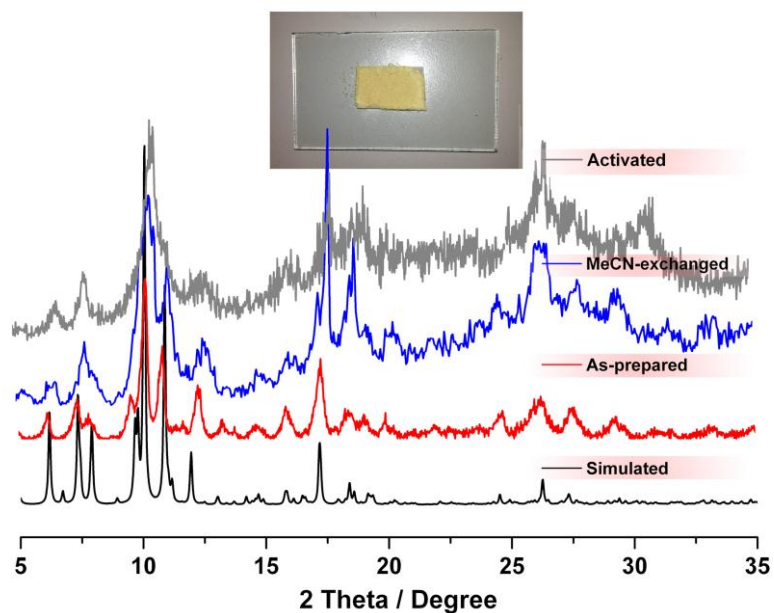

**Figure S6.** PXRD patterns of **FJI-3**: a) simulated from the crystallographic information file; b) from the as-prepared sample; c) from the MeCN-exchanged sample; d) from the desolvated sample.

## S6. Thermal Gravimetric Plots

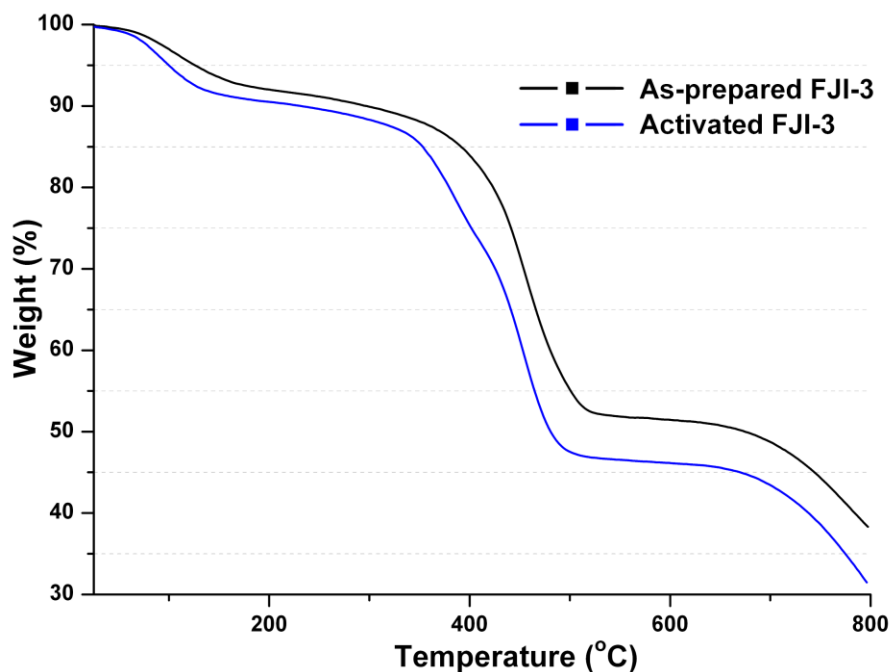

**Figure S7.** TGA curves for fresh and desolvated **FJI-3** samples.

## S8 Gas Sorption Test

*N<sub>2</sub>, H<sub>2</sub> and CO<sub>2</sub> Isotherms.* N<sub>2</sub>, H<sub>2</sub> and CO<sub>2</sub> isotherms were determined using an IGA gravimetric adsorption apparatus at the Fujian Institute of Research on the Structure of Matter in a clean ultra high vacuum system. Before measurements, about 100 mg MeCN-exchanged samples were loaded into the sample basket within the adsorption instrument and then degassed under dynamic vacuum for 10 h to obtain the fully desolvated samples.

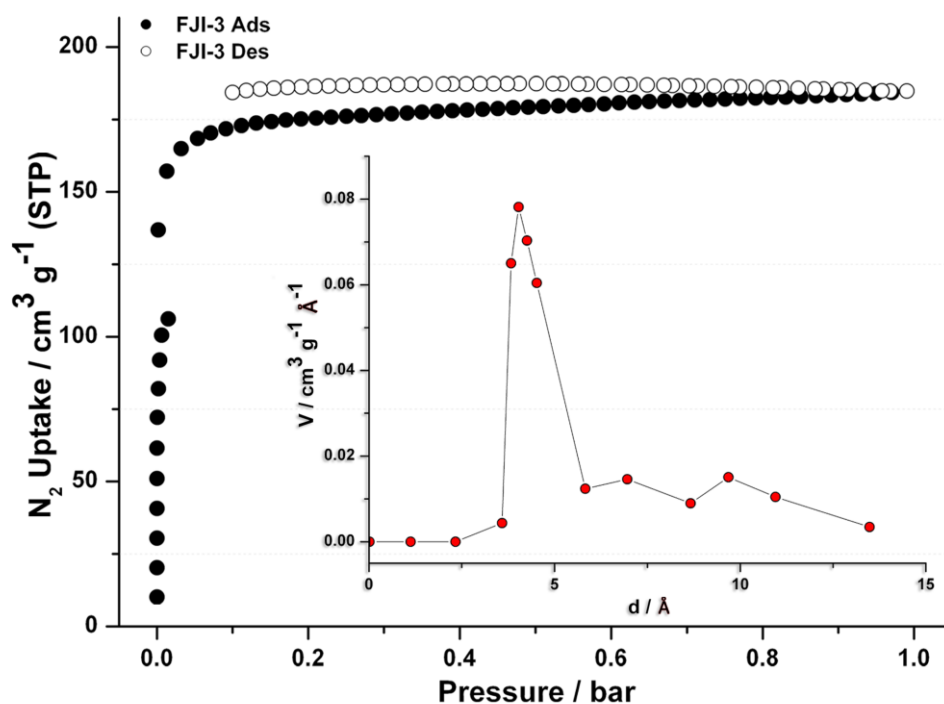

**Figure S8.** N<sub>2</sub> adsorption-desorption isotherms for activated **FJI-3** at 77 K.

H<sub>2</sub> isotherms measured at 77 K and 87 K for **FJI-3** were fit to the following Equation

In Fig. S11, the adsorption heat (Q<sub>st</sub>) of hydrogen for the desolvated **FJI-3** is fitted by Virial method using the data obtained from 77 K and 87 K.

$$\ln(p) = \ln(N) + \frac{1}{T} \sum_{i=0}^m a_i * N_i + \frac{1}{T} \sum_{j=0}^m a_j * N_j$$

N: adsorbed quantity (mg/g);

p: pressure (mmHg);

T: Temperature (K);

a<sub>i</sub>、 b<sub>j</sub>: Constant;

R: 8.314 J·mol<sup>-1</sup>·K<sup>-1</sup>;

The isosteric enthalpy of adsorption (Q<sub>st</sub>):

$$Q_{st} = -R \ln(p) = -R * \sum_{i=0}^m a_i * N_i$$



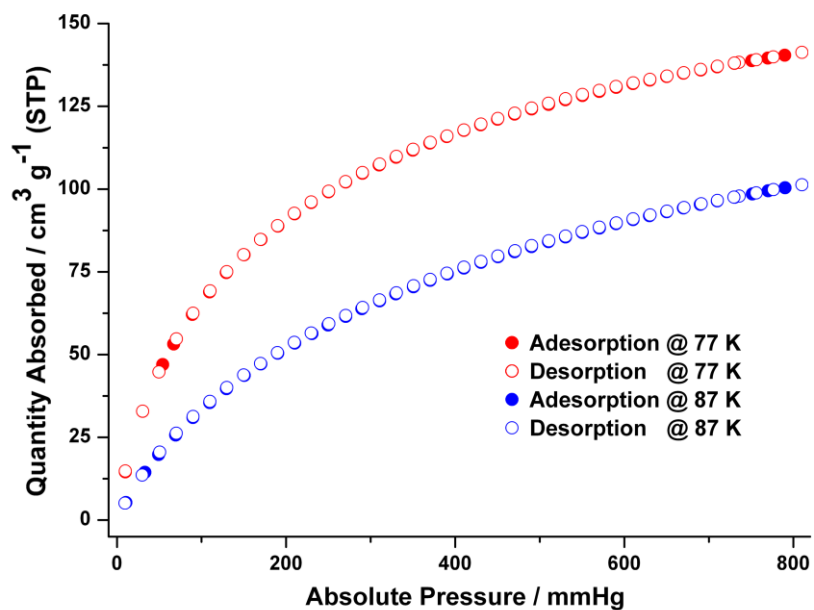

Figure S9 H<sub>2</sub> sorption isotherms for FJI-3 at 77 and 87 K.

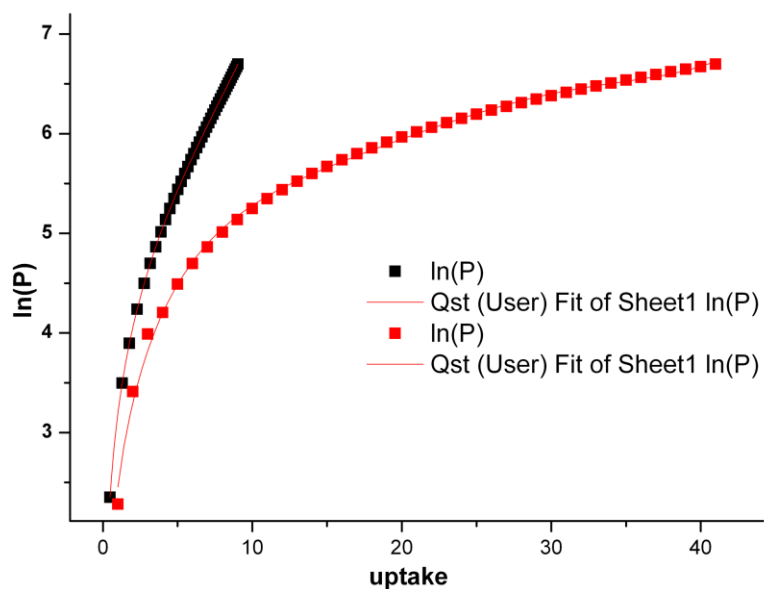

Figure S10 Nonlinear curve fitting of H<sub>2</sub> adsorption isotherms for FJI-3 at 77 K and 87 K.

$$y = \ln(x) + 1/k * (a_0 + a_1 * x + a_2 * x^2 + a_3 * x^3 + a_4 * x^4 + a_5 * x^5) + (b_0 + b_1 * x + b_2 * x^2)$$

|       |     | Value      | Standard Error |
|-------|-----|------------|----------------|
| ln(P) | a0* | -500.34342 | 29.43741       |
|       | a1* | 14.32361   | 11.08673       |
|       | a2* | -8.55931   | 0.97831        |
|       | a3* | 0.0905     | 0.0118         |
|       | a4* | -0.00207   | 3.08327E-4     |
|       | a5* | 1.75898E-5 | 2.92473E-6     |
|       | b0* | 8.76101    | 0.35181        |
|       | b1* | 0.02873    | 0.13087        |
|       | b2* | 0.08754    | 0.01096        |
|       | k   | 77         | 0              |
|       | k   | 87         | 0              |

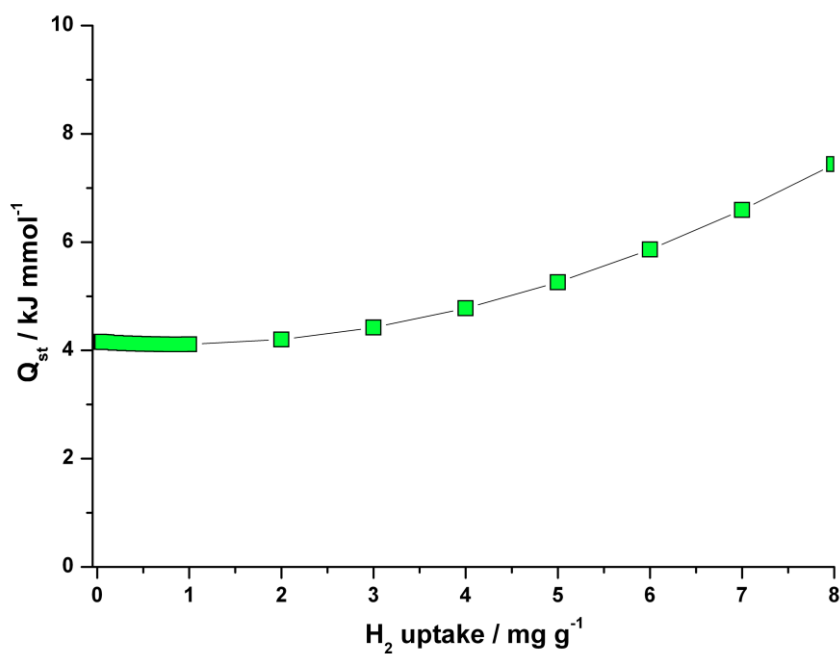

Figure S11 Heats of adsorption for H<sub>2</sub> in FJI-3.

## S9 IAST adsorption selectivity calculation

We adopt the ideal adsorbed solution theory (IAST)<sup>S7</sup> based upon the experimental single gas adsorption measurements as listed in the following pages, including carbon dioxide, methane and nitrogen at 273 K and 295 K, which is commonly used to predict binary mixture adsorption selectivity. Using the pure component isotherm fits, the adsorption selectivity is defined by

$$S_{ads} = (q_1/q_2)/(p_1/p_2),$$

where  $q_i$  is the amount of  $i$  adsorbed and  $p_i$  is the partial pressure of  $i$  in the mixture.

We use the following written codes to simulate the adsorption selectivity of CO<sub>2</sub> over CH<sub>4</sub> or N<sub>2</sub> in Fig. 3d,

```
28          # No. of Pressure Point

y1, y2      # Molar fraction of binary mixture (y1 and y2, y1 + y2 = 1)

1, 2, 3, 4, 5, 6, 7, 8, 9, 10, 20, 30, 40, 50, 60, 70, 80, 90, 100, 101, 102, 103,
104, 105, 106, 107, 108, 109    #The unit is same parameter b, kPa

a1, a1      # fitting parameter Nsat1(A1) for both component (Unit: mmol/g)

b1, b1      # fitting parameter b1 for both component (Unit: kPa-1)

c1, c1      # fitting parameter c1 for both component

0, 0        # fitting parameter Nsat2(A2) for both component (Unit: mmol/g)

0, 0        # fitting parameter b2 for both component (Unit: kPa-1)

1, 1        # fitting parameter c2 for both component
```

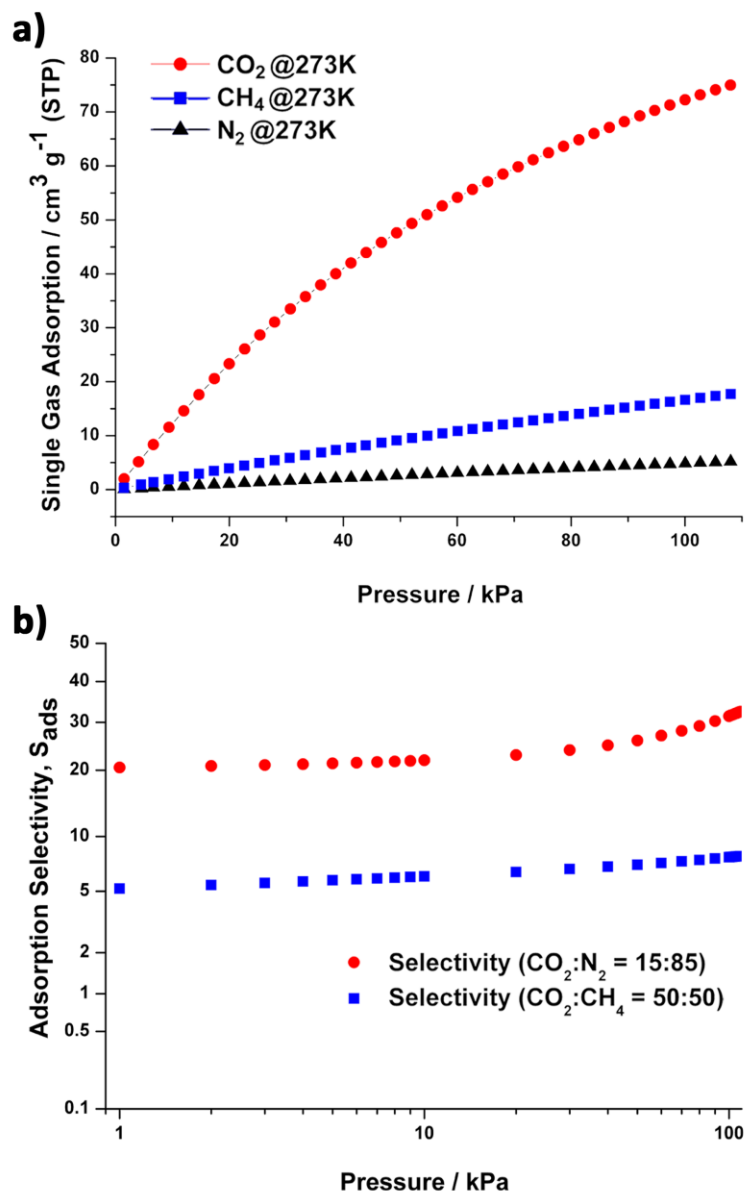

**Figure S12:** (a) CO<sub>2</sub>, CH<sub>4</sub> and N<sub>2</sub> adsorption isotherm curves in the range of 0 ~ 110 kPa at 273 K. (b) Adsorption selectivity of CO<sub>2</sub> over CH<sub>4</sub> or N<sub>2</sub>.

## S9. References.

[S1] Sheldrick, G. M. SHELXS-97, Programs for X-ray Crystal Structure Solution;  
University of Göttingen: Germany, **1997**.

[S2] (a) A. L. Spek, *J. Appl. Crystallogr.* **2003**, *36*, 7; (b) P. v.d. Sluis and A. L. Spek,  
*Acta Crystallogr., Sect. A*, **1990**, *46*, 194.
